# Supplementary material for: Talin regulates moesin–NHE-1 recruitment to invadopodia and promotes mammary tumor metastasis
Source: PubMed Central journal article supplement — J Cell Biol. 2014 Jun 9;205(5):737–51. doi: 10.1083/jcb.201312046 (PMC4050723; doi:10.1083/jcb.201312046), 2014-06-09
Supplement: supp_jcb.201312046_JCB_201312046_sm.pdf [file supp_jcb.201312046_JCB_201312046_sm.pdf]

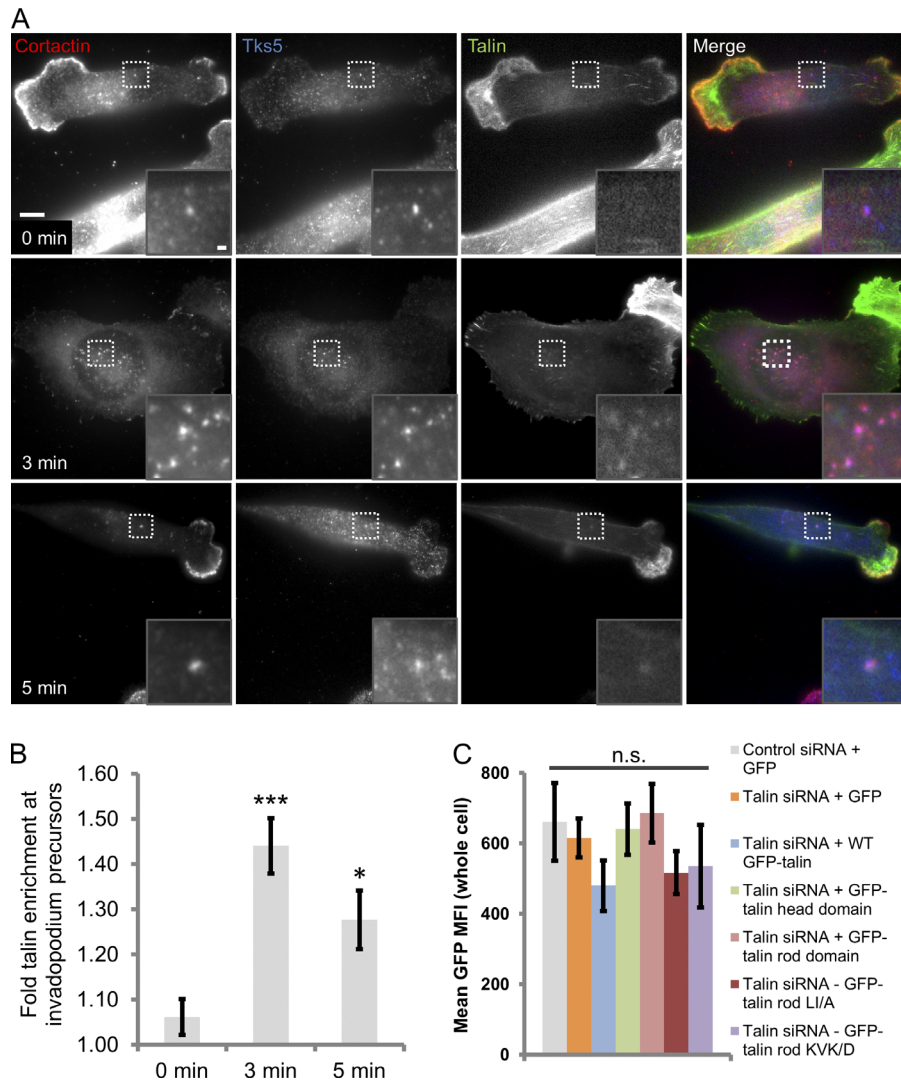

Figure S1. **Talin localizes to invadopodium precursors in response to EGF stimulation.** (A and B) Invadopodium precursor formation assay. (A) Representative image of MDA-MB-231 cell expressing GFP-talin and then stimulated with 2.5 nM EGF for 0 (unstimulated), 3 or 5 min. Cells were then stained for cortactin and Tks5 to identify invadopodium precursors. Inset shows magnified image of invadopodia in the box. Bars: (main panel) 10  $\mu$ m; (inset) 1  $\mu$ m. (B) Talin enrichment at invadopodium precursors was quantified at 0, 3, and 5 min after EGF stimulation.  $n > 20$  invadopodia; two independent experiments. \*\*\*,  $P = 0.00055$ ; \*,  $P = 0.036$ ; 3 vs. 5 min, not significant. (C) Quantification of the mean fluorescent intensity (MFI) of GFP and GFP-tagged talin constructs in cells transfected with control or talin siRNA, showing that the constructs are expressed to a similar level.  $n > 30$  cells; three independent experiments. n.s., not significant ( $P > 0.05$ ). Error bars represent the SEM.

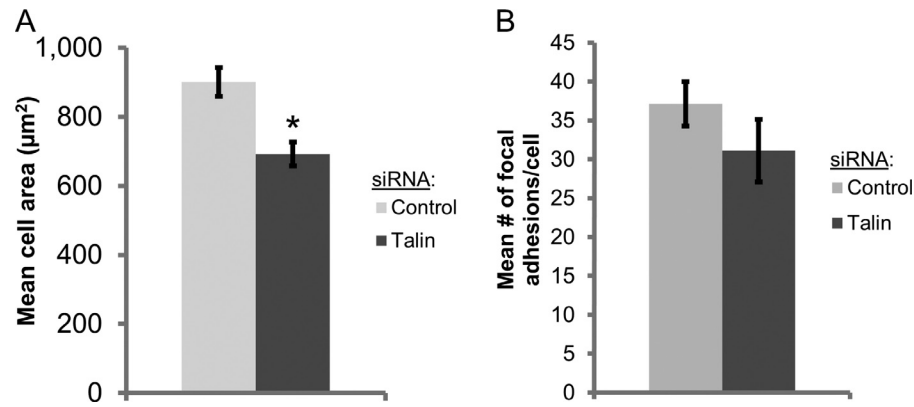

Figure S2. **Talin knockdown reduces cell area but does not affect focal adhesion formation in MDA-MB-231 cells plated on 405-labeled gelatin.** (A) Quantification of cell area in MDA-MB-231 cells plated on 405-labeled gelatin.  $n > 31$  cells; two independent experiments. \*\*\*,  $P = 0.00039$ . (B) Quantification of focal adhesion number in MDA-MB-231 cells plated on 405-labeled gelatin.  $n > 24$  cells; two independent experiments. n.s., not significant ( $P > 0.05$ ). Error bars represent the SEM.

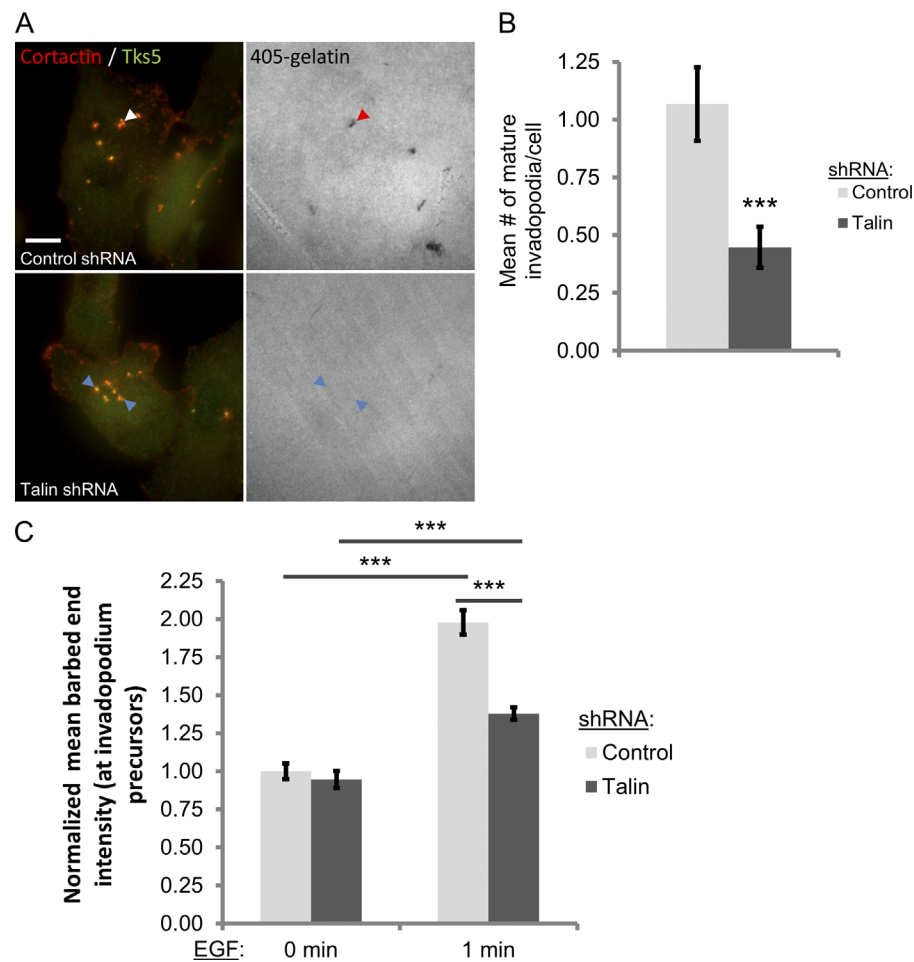

Figure S3. **Invadopodium maturation requires talin in MTLn3 cells.** (A and B) Steady-state invadopodial matrix degradation assay. (A) Representative images of MTLn3 cells stained for cortactin and Tks5. White/red arrowheads denote mature invadopodia; blue arrowheads denote invadopodium precursors. Bar, 10  $\mu\text{m}$ . (B) Quantification of the number of mature invadopodia per MTLn3 control or talin shRNA cell. Mature invadopodia are defined as cortactin-/Tks5-rich punctate structures colocalized with a matrix degradation hole.  $n > 89$  cells; three independent experiments. \*\*\*,  $P = 5.5 \times 10^{-4}$ . (C) Quantification of barbed end intensity within invadopodium precursors after stimulation with 5 nM EGF for 0 (unstimulated) or 1 min.  $n > 107$  invadopodia; two independent experiments. \*\*\*,  $P = 1.95 \times 10^{-9}$ . Error bars represent the SEM.

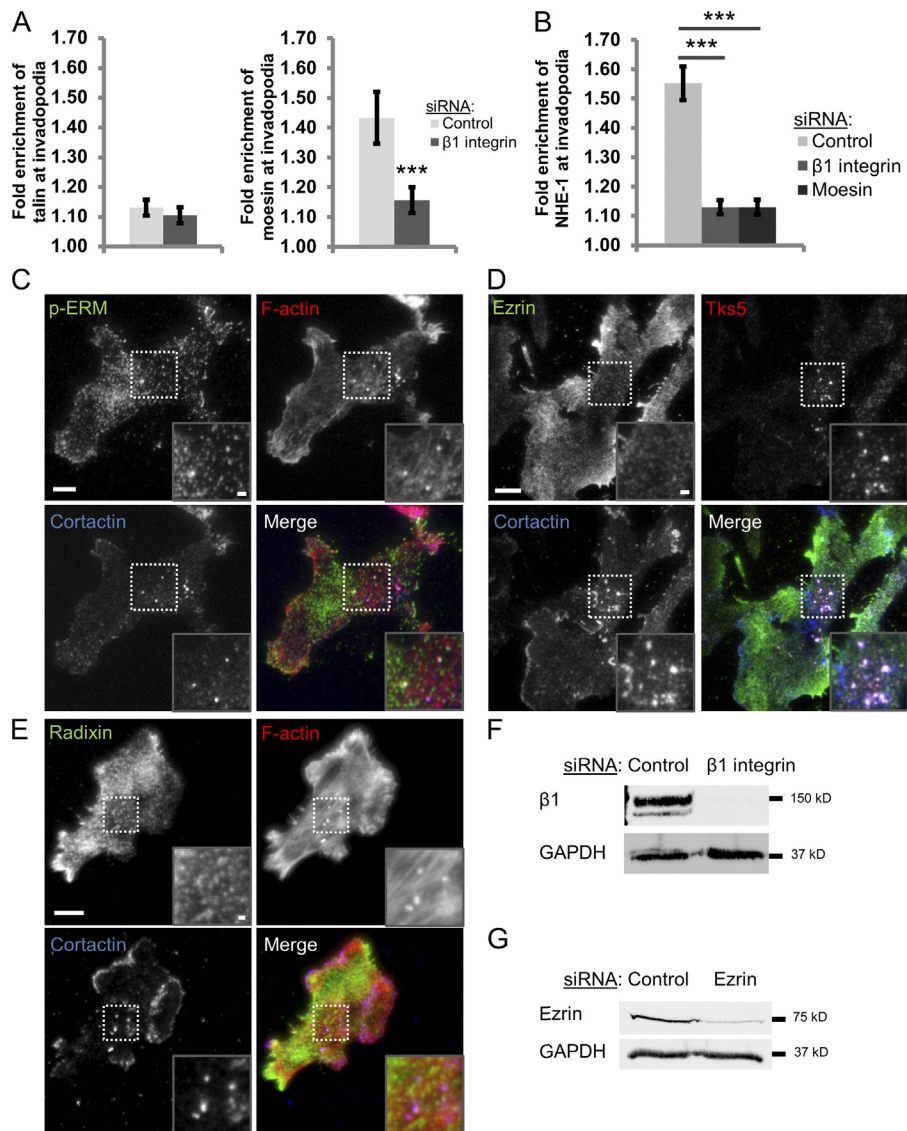

Figure S4.  $\beta 1$  integrin is not required for talin localization to invadopodia, but is necessary for moesin and NHE-1 recruitment to invadopodia and characterization of ERM protein localization at invadopodia. (A) Quantification of talin (left) and moesin (right) enrichment at invadopodia relative to cytosolic levels in control and  $\beta 1$  integrin siRNA-treated cells. Talin enrichment,  $n > 94$  invadopodia; three independent experiments. Moesin enrichment,  $n > 57$  invadopodia; two independent experiments. \*\*\*,  $P < 0.0072$ . (B) Quantification of NHE-1 enrichment at invadopodia in control,  $\beta 1$  integrin, and moesin siRNA-treated cells.  $n > 85$  invadopodia; two independent experiments. \*\*\*,  $P < 3.8 \times 10^{-7}$ . Error bars represent the SEM. (C) Representative TIRF image of MDA-MB-231 cells stained for pan-phospho-ERM, F-actin (phalloidin), and cortactin, showing that phosphorylated ERM proteins are enriched at invadopodia above levels in the surrounding cytoplasm. Inset shows magnified image of invadopodia in the box. Bars: (main panel) 10  $\mu\text{m}$ ; (inset) 2  $\mu\text{m}$ . (D) Representative TIRF image of MDA-MB-231 cells stained for ezrin, cortactin, and Tks5, showing that ezrin is not enriched above the surrounding cytoplasm. Inset shows magnified image of invadopodia in the box. Bars: (main panel) 10  $\mu\text{m}$ ; (inset) 2  $\mu\text{m}$ . (E) Representative TIRF image of MDA-MB-231 cells stained for radixin, F-actin (phalloidin), and cortactin, showing that radixin localizes poorly to invadopodia. Inset shows magnified image of invadopodia in the box. Bars: (main panel) 10  $\mu\text{m}$ ; (inset) 2  $\mu\text{m}$ . (F) Western blot analysis of MDA-MB-231 cells expressing control or  $\beta 1$  integrin siRNA for 96 h. Blots were stained for  $\beta 1$  integrin and GAPDH (loading control). (G) Western blot analysis of MDA-MB-231 cells expressing control or ezrin siRNA for 72 h. Blots were stained for ezrin and GAPDH (loading control).

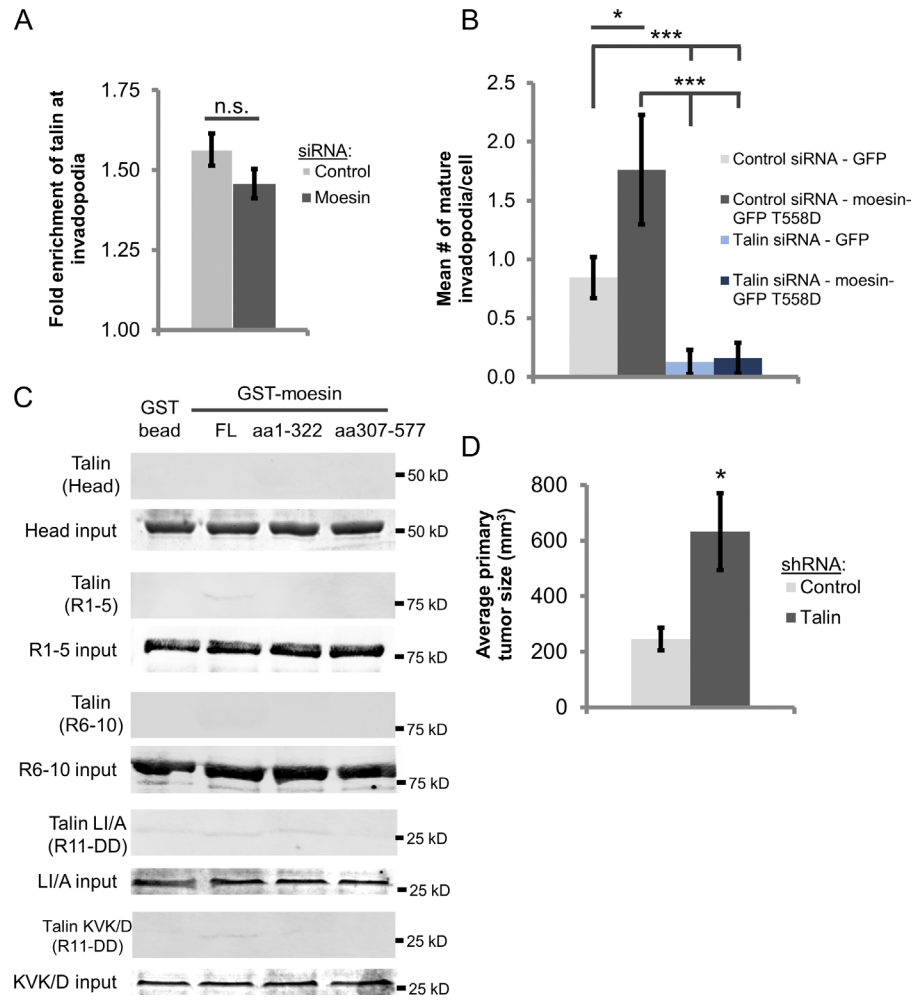

Figure S5. **Talin-moesin interaction in vitro and in vivo.** (A) Moesin knockdown does not affect talin recruitment to invadopodia. Quantification of talin enrichment at invadopodia relative to cytosolic levels in control and moesin siRNA-treated cells.  $n > 44$  cells; two independent experiments. (B) Talin is required for moesin-dependent invadopodium maturation. Quantification of the number of mature invadopodia in control and talin siRNA-treated cells expressing either GFP or moesin-GFP T558D and plated on 405-labeled gelatin.  $n > 31$  cells; two independent experiments. \*,  $P = 0.047$ ; \*\*\*,  $P < 0.01$ . (C) In vitro direct binding pull-down assay with His-tagged talin rod constructs and GST-tagged moesin fused to agarose beads. Western blots are stained for talin (antibody clone TA205, head; 8d4, R1-5; goat polyclonal, R6-10; R11-DD LI/A and KVK/D, anti-His tag). Three independent experiments. (D) Effect of talin knockdown on primary tumor growth. Quantification of mammary MTLn3 tumor size in control or talin shRNA mice.  $n = 5$  mice; \*,  $P = 0.043$ . Error bars represent the SEM.

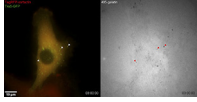

Video 1. **Control siRNA-treated MDA-MB-231 cells form long-lived, stable invadopodia that mature to degrade the ECM.** Control cells were transfected with TagRFP-cortactin (red) and GFP-Tks5 (green) and plated on 405-labeled gelatin. Cells were imaged using the DeltaVision Core Microscope (Applied Precision). Movie shows time-lapse images acquired every 2 min; 4.2 frames/s. Arrowheads denote mature invadopodia (white) and their corresponding matrix degradation holes (red). Invadopodia formed in these cells are very stable, remaining in a single location often for hours, and degrade the ECM.

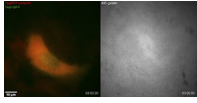

Video 2. **Talin siRNA-treated MDA-MB-231 cells form short-lived, unstable invadopodia that fail to mature and degrade the ECM.** Talin-depleted cells were transfected with TagRFP-cortactin (red) and GFP-Tks5 (green) and plated on 405-labeled gelatin. Cells were imaged using the DeltaVision Core Microscope (Applied Precision). Movie shows time-lapse images acquired every 2 min; 4.2 frames/s. Arrowheads denote invadopodium precursors (white) and their lack of corresponding matrix degradation holes (red). Invadopodia formed in these cells are unstable, remaining in a single location for an average of only 10–20 min, and do not degrade the ECM.

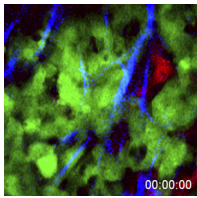

Video 3. **Control shRNA tumor cell motility in vivo.** MTLn3 cells stably expressing control shRNA and Dendra2 migrating in vivo. Tumors were imaged using the custom multiphoton microscope (Entenberg et al., 2011). Movie shows time-lapse images of an area of the tumor near blood vessels (images acquired every 3 min for 1.5 h; 10 frames/s). White arrowheads denote motile cells.

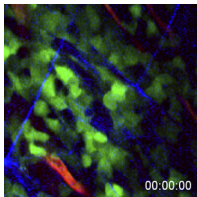

Video 4. **Talin shRNA tumor cells have reduced motility in vivo.** MTLn3 cells stably expressing talin shRNA and Dendra2 migrating in vivo. Tumors were imaged using the custom multiphoton microscope (Entenberg et al., 2011). Movie shows time-lapse images of an area of the tumor near blood vessels (images acquired every 3 min for 1.5 h; 10 frames/s). Note that these cells are considerably less motile than control tumor cells in similar microenvironments in vivo.

## Reference

Entenberg, D., J. Wyckoff, B. Gligorijevic, E.T. Roussos, V.V. Verkhusha, J.W. Pollard, and J. Condeelis. 2011. Setup and use of a two-laser multiphoton microscope for multichannel intravital fluorescence imaging. *Nat. Protoc.* 6:1500–1520. <http://dx.doi.org/10.1038/nprot.2011.376>
